# Supplementary material for: Effects of NaCl on Antioxidant, Antifungal, and Antibacterial Activities in Safflower Essential Oils
Source: MDPI journal article supplement (doi:10.3390/plants10122809), 2021-12-18
Supplement: s1 [file s1]

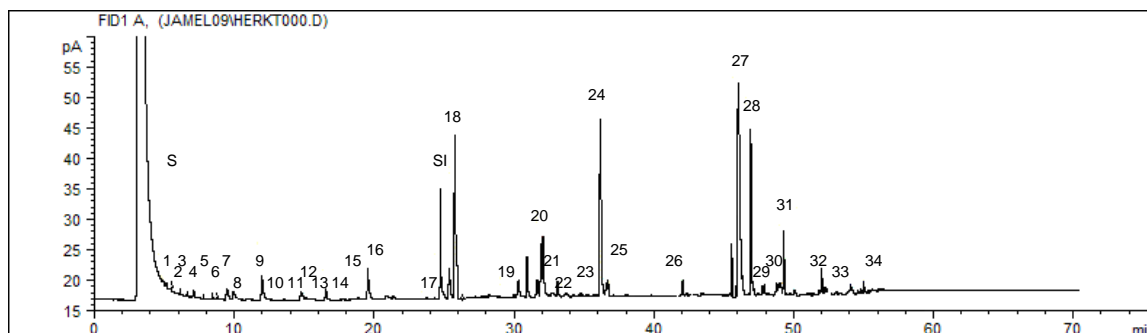

**Figure S1.** EO chromatogram of *C. tinctorius* L. roots from plants grown on control medium

(s: solvent, SI: internal standard, 1:  $\alpha$ -Pinene, 2:  $\alpha$ -Thujene, 3: Camphene, 4:  $\beta$ -Pinene, 5: Sabinene, 6:  $\delta$ -3 Carene, 7: Myrcene, 8:  $\alpha$ -Terpinene, 9: Myrtenal, 10: Limonene, 11: 1,8 Cineole, 12: *E*-2-Hexenal, 13:  $\gamma$ -Terpinene, 14:  $\beta$ -Ocimene, 15: *P*-Cymene, 16: Terpinolene, 17: Z-3-Hexenol, 18:  $\beta$ -Thujone, 19: *Trans*- $\alpha$ -Bergamotene, 20:  $\beta$ -Muuroleone, 21: Linalool, 22: Bornyl acetate, 23: Terpinene-4-ol, 24:  $\beta$ -Caryophyllene, 25:  $\alpha$ -Terpineol, 26:  $\delta$ -Cadinene, 27:  $\gamma$ -Cadinene, 28: 1-pentadecene, 29: Methyl-eugenol, 30: Caryophyllene oxide, 31: Spathulenol, 32: Cinnamyl acetate, 33: Eugenol, 34: Elemicine).

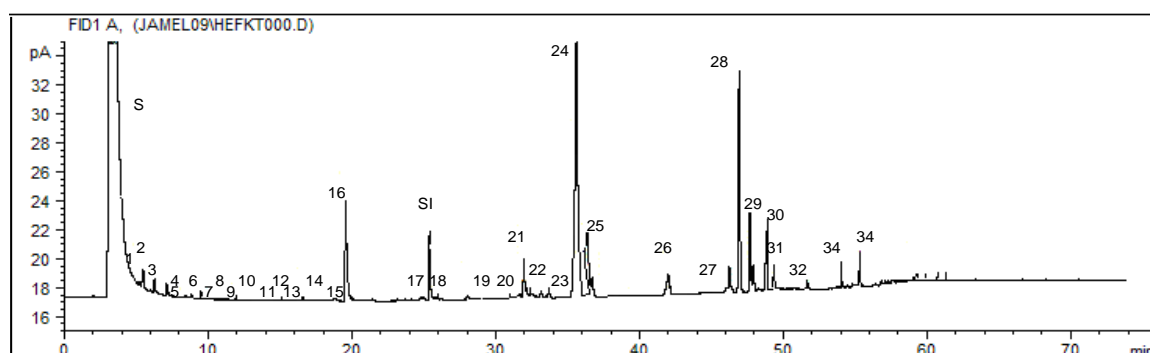

**Figure S2.** Chromatogram of EO of *C. tinctorius* L. leaves from plants grown on control medium.

(s: solvent, SI: internal standard, 1:  $\alpha$ -Pinene, 2:  $\alpha$ -Thujene, 3: Camphene, 4:  $\beta$ -Pinene, 5: Sabinene, 6:  $\delta$ -3 Carene, 7: Myrcene, 8:  $\alpha$ -Terpinene, 9: Myrtenal, 10: Limonene, 11: 1,8 Cineole, 12: *E*-2-Hexenal, 13:  $\gamma$ -Terpinene, 14:  $\beta$ -Ocimene, 15: *P*-Cymene, 16: Terpinolene, 17: Z-3-Hexenol, 18:  $\beta$ -Thujone, 19: *Trans*- $\alpha$ -Bergamotene, 20:  $\beta$ -Muuroleone, 21: Linalool, 22: Bornyl acetate, 23: Terpinene-4-ol, 24:  $\beta$ -Caryophyllene, 25:  $\alpha$ -Terpineol, 26:  $\delta$ -Cadinene, 27:  $\gamma$ -Cadinene, 28: 1-pentadecene, 29: Methyl-eugenol, 30: Caryophyllene oxide, 31: Spathulenol, 32: Cinnamyl acetate, 33: Eugenol, 34: Elemicine).

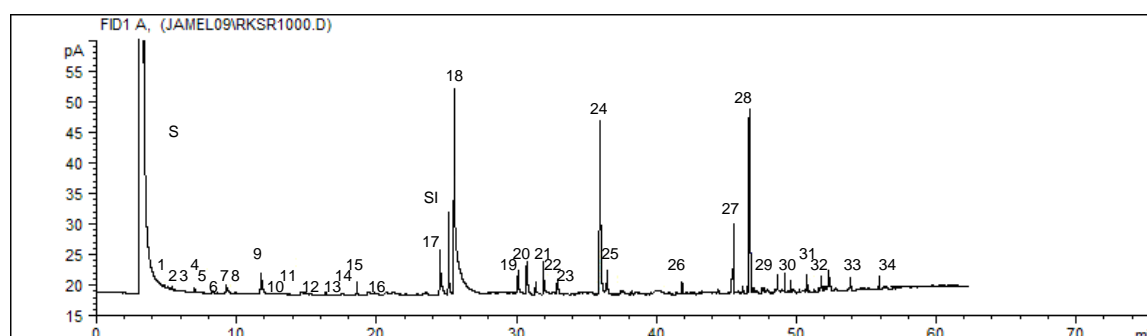

**Figure S3.** Chromatogram of EO of *C. tinctorius* L. roots from plants treated with NaCl, 50 mM.

(s: solvent, SI: internal standard, 1:  $\alpha$ -Pinene, 2:  $\alpha$ -Thujene, 3: Camphene, 4:  $\beta$ -Pinene, 5: Sabinene, 6:  $\delta$ -3 Carene, 7: Myrcene, 8:  $\alpha$ -Terpinene, 9: Myrtenal, 10: Limonene, 11: 1,8 Cineole, 12: *E*-2-Hexenal, 13:  $\gamma$ -Terpinene, 14:  $\beta$ -Ocimene, 15: *P*-Cymene, 16: Terpinolene, 17: Z-3-Hexenol, 18:  $\beta$ -Thujone, 19: *Trans*- $\alpha$ -Bergamotene, 20:  $\beta$ -Muuroleone, 21: Linalool, 22: Bornyl acetate, 23: Terpinene-4-ol, 24:  $\beta$ -Caryophyllene, 25:  $\alpha$ -Terpineol, 26:  $\delta$ -Cadinene, 27:  $\gamma$ -Cadinene, 28: 1-pentadecene, 29: Methyl-eugenol, 30: Caryophyllene oxide, 31: Spathulenol, 32: Cinnamyl acetate, 33: Eugenol, 34: Elemicine).

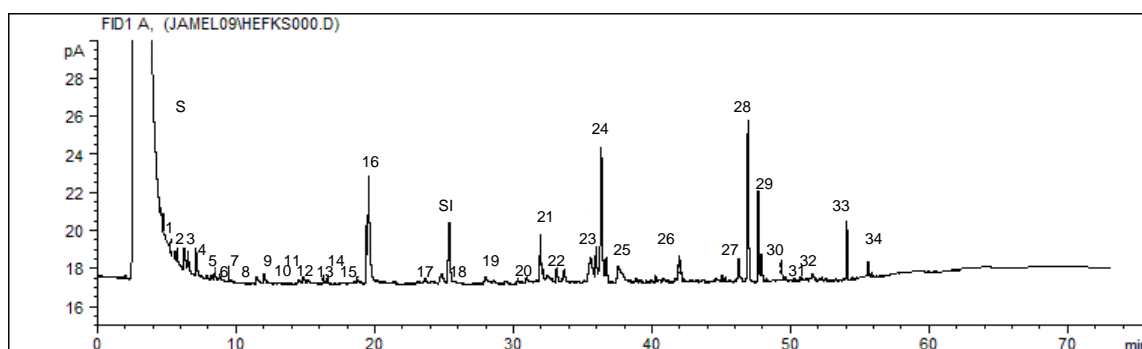

**Figure S4.** Chromatogram of EO of *C. tinctorius* L. leaves from plants treated with NaCl, 50 mM.

(s: solvent, SI: internal standard, 1:  $\alpha$ -Pinene, 2:  $\alpha$ -Thujene, 3: Camphene, 4:  $\beta$ -Pinene, 5: Sabinene, 6:  $\delta$ -3 Carene, 7: Myrcene, 8:  $\alpha$ -Terpinene, 9: Myrtenal, 10: Limonene, 11: 1,8 Cineole, 12: *E*-2-Hexenal, 13:  $\gamma$ -Terpinene, 14:  $\beta$ -Ocimene, 15: *P*-Cymene, 16: Terpinolene, 17: *Z*-3-Hexenol, 18:  $\beta$ -Thujone, 19: *Trans*- $\alpha$ -Bergamotene, 20:  $\beta$ -Muuroolene, 21: Linalool, 22: Bornyl acetate, 23: Terpinene-4-ol, 24:  $\beta$ -Caryophyllene, 25:  $\alpha$ -Terpineol, 26:  $\delta$ -Cadinene, 27:  $\gamma$ -Cadinene, 28: 1-pentadecene, 29: Methyl-eugenol, 30: Caryophyllene oxide, 31: Spathulenol, 32: Cinnamyl acetate, 33: Eugenol, 34: Elemicine).
